# Supplementary material for: Donor–acceptor-modified UiO-67-type metal–organic frameworks for the enhanced photodegradation of tetracycline under visible light
Source: Royal Society of Chemistry journal article supplement (doi:10.1039/d3qi02081a), 2023-11-23
Supplement: d3qi02081a1.pdf [file d3qi02081a1.pdf]

Electronic Supplementary Material (ESI) for Inorganic Chemistry Frontiers. This journal is © the Partner Organisations 2023

## **Donor-acceptor modified UiO-67 type metal-organic frameworks for the enhancing photoreduction of tetracycline under visible light**

**Jinqiang Xu,<sup>a</sup> Ting Zhou,<sup>b</sup> Ye Bi,<sup>a</sup> Huadong Guo,<sup>a,\*</sup> Yanan Su,<sup>a</sup> Lishan Wang,<sup>a</sup> Mingxue Shao,<sup>a</sup> Yan Wang,<sup>a</sup> and Xianmin Guo<sup>a,\*</sup>**

<sup>a</sup>College of Chemistry, Changchun Normal University, Changchun 130032, China.

<sup>b</sup>School of Chemistry and Chemical Engineering, Jiangsu University. Zhenjiang 212013, China.

### **Content**

|                                                       |          |
|-------------------------------------------------------|----------|
| <b>1. Syntheses and Experimental Procedures .....</b> | <b>2</b> |
| 1.1 General Information .....                         | 2        |
| 1.2 Synthesis of ligands .....                        | 2        |
| 1.2 Synthesis of materials .....                      | 5        |
| <b>2. Characterization of catalysts .....</b>         | <b>6</b> |
| <b>3. References.....</b>                             | <b>8</b> |

# 1. Syntheses and Experimental Procedures

## 1.1 General Information

All chemicals and reagents were used from commercial sources and were not purified. Solvents for chemical synthesis were purified by distillation. All organic synthesis reactions were carried out under nitrogen. Powder X-ray diffraction (PXRD) data were recorded on a Bruker D2 phase apparatus. Thermogravimetric analysis (TGA) was performed on a Perkin-Elmer TG-7 analyzer, heated from 30 to 800 °C under nitrogen. Shimadzu UV-3101PC photometer was used for UV-vis absorption spectra. Electron paramagnetic resonance (EPR) spectroscopy was measured on EMX-nano with Xe Lamp (CEL-HXF300) as light source. Photoelectrochemical tests were performed using a computer-controlled electrochemical workstation (Chi 760E). The solid-state fluorescence emission spectra were measured on the Hitachi F7000 spectrometer.

## 1.2 Synthesis of ligands

### Synthesis of H<sub>2</sub>BT

Methyl 7-bromobenzo[*c*][1,2,5]thiadiazole-4-carboxylate (2.73 g, 10 mmol), K<sub>2</sub>CO<sub>3</sub> (2.76 g, 20 mmol), Pd(PPh<sub>3</sub>)<sub>4</sub> (0.58 g, 0.5 mmol), 4-methoxycarbonylbenzeneboronic acid (2.16 g, 12 mmol), and THF (70 ml) were mixed and refluxed for 3 days under N<sub>2</sub> protection. The mixture was cooled to room temperature, and THF was removed under vacuum. The residue was operated by column chromatography to obtain the yellow solid methyl 7-(4-methoxycarbonylphenyl)benzo[*c*][1,2,5]thiadiazole-4-carboxylate (1.64 g, 51%). The intermediate ester (1.64 g, 5 mmol), methanol (10 mL) and sodium hydroxide (50 mL, 5 mmol) were refluxed overnight. Acidification with dilute hydrochloric acid afforded 7-(4-carboxyphenyl)benzo[*c*][1,2,5]thiadiazole-4-carboxylic acid (1.3 g, 86%) as a yellow solid. <sup>1</sup>H NMR (500 MHz, DMSO-*d*) δ 13.28 (s, 2H), 8.41 (s, 1H), 8.40 (s, 1H), 8.13 (s, 2H), 8.04 (d, *J* = 7.39Hz, 2H).

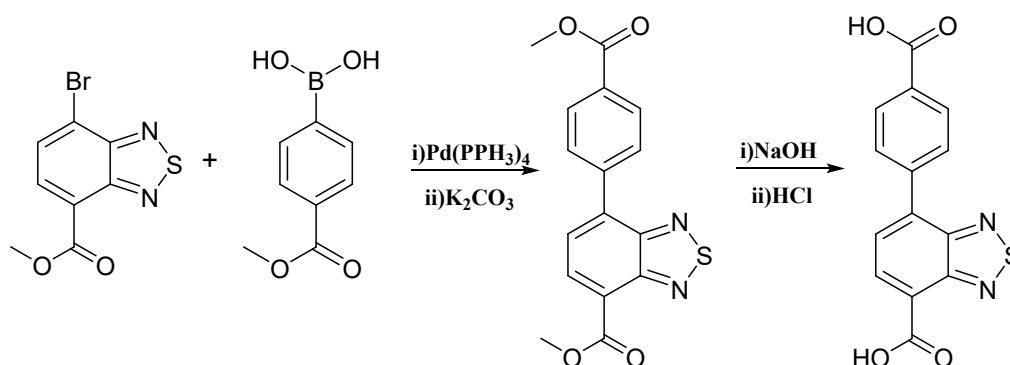

Scheme 1. The synthesis route of H<sub>2</sub>BT.

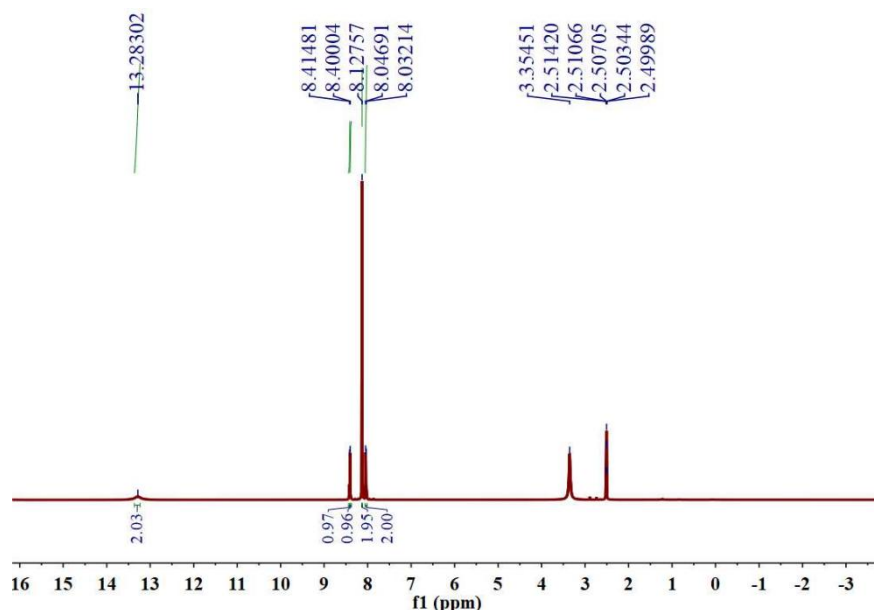

Fig. R1.  $^1\text{H}$  NMR of  $\text{H}_2\text{BT}$ .

### Synthesis of $\text{H}_2\text{NA}$

Methyl 4-bromo-1-naphthalenecarboxylate (2.65 g, 10 mmol), DMF (50 mL),  $\text{K}_2\text{CO}_3$  (2.76 g, 20 mmol),  $\text{Pd}(\text{PPh}_3)_4$  (0.58 g, 0.5 mmol), and 4-methoxycarbonylphenylboronic acid (2.16 g, 12 mmol) were mixed and stirred at reflux for 2 days under  $\text{N}_2$  protection. After cooling, the reactants were poured into water and the mixture was extracted with  $\text{CHCl}_3$  and subsequently dried with anhydrous magnesium sulfate. After the removal of  $\text{CHCl}_3$ , the residue was operated by column chromatography with  $\text{CHCl}_3$  to give a white solid methyl 4-(4-methoxycarbonylphenyl)-1-naphthoate (2.06 g, 64%). The intermediate ester (2.06 g, 6.4 mmol), methanol (10 mL) and sodium hydroxide (30 mL, 90 mmol) were refluxed and stirred overnight. After cooling, the mixture was then acidified with dilute hydrochloric acid to give 4-(4-carboxyphenyl)-1-naphthoic acid (2.0 g, 97%) as a white solid.  $^1\text{H}$  NMR (500 MHz,  $\text{DMSO-d}_6$ )  $\delta$  13.20 (s, 2H), 8.96 (d,  $J = 8.5$  Hz, 1H), 8.24 – 8.18 (m, 1H), 8.15 – 8.07 (m, 2H), 7.82 (d,  $J = 8.5$  Hz, 1H), 7.71 – 7.67 (m, 1H), 7.65 – 7.60 (m, 2H), 7.60 – 7.56 (m, 1H), 7.54 (dd,  $J = 10.3, 6.6$  Hz, 1H).

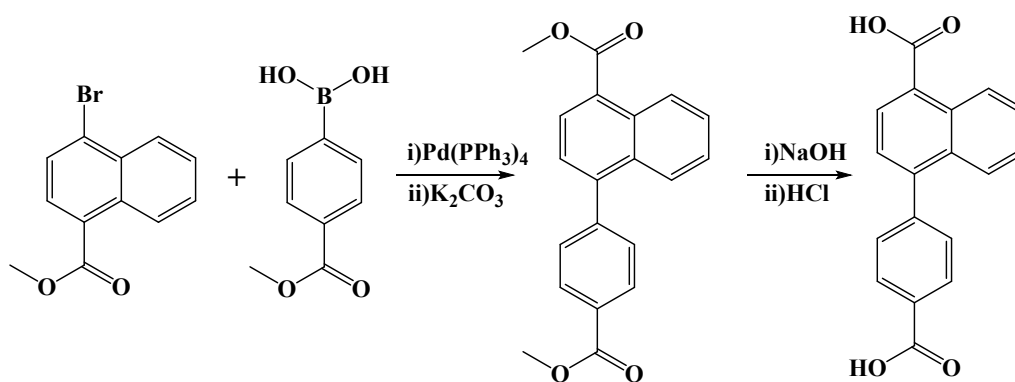

Scheme 2. The synthesis route of  $\text{H}_2\text{NA}$ .

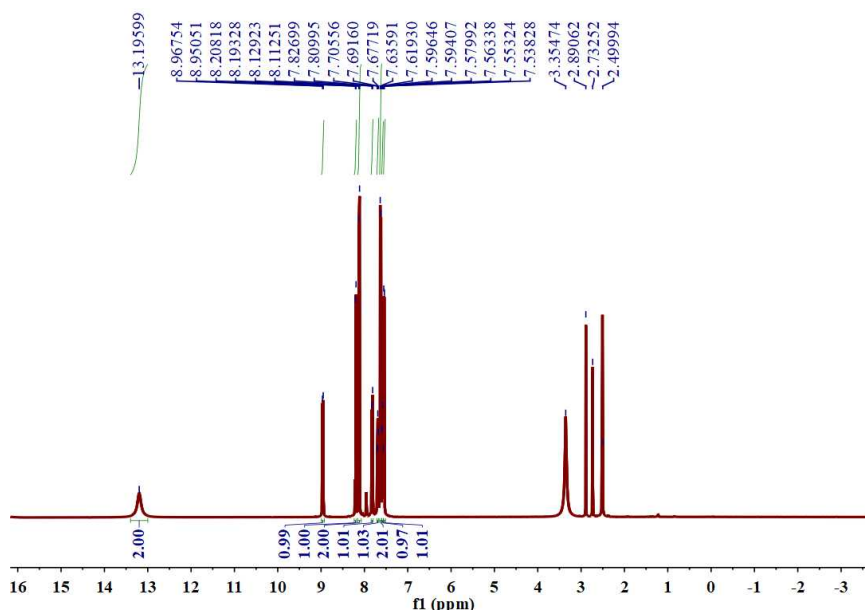

Fig. R2.  $^1\text{H}$  NMR of  $\text{H}_2\text{NA}$ .

### Synthesis of $\text{H}_2\text{NB}$

Methyl 7-bromobenzo[*c*][1,2,5]thiadiazole-4-carboxylate (2.73 g, 10 mmol),  $\text{K}_2\text{CO}_3$  (2.76 g, 20 mmol),  $\text{Pd}(\text{PPh}_3)_4$  (0.58 g, 0.5 mmol), (4-(methoxycarbonyl)naphthalen-1-yl)boronic acid (2.76 g, 12 mmol), THF (70 ml) were mixed and refluxed for 2 days under  $\text{N}_2$  protection. The mixture was cooled to room temperature, and THF was removed under vacuum. The residue was operated by column chromatography with  $\text{CHCl}_3$  to give a white solid methyl 7-(4-(methoxycarbonyl)naphthalen-1-yl)benzo[*c*][1,2,5]thiadiazole-4-carboxylate (1.38 g, 39%). The intermediate ester (1.38 g, 3.9 mmol), methanol (10 mL) and sodium hydroxide (30 mL, 90 mmol) were refluxed and stirred overnight. After cooling, it was acidified with dilute hydrochloric acid to give 4-(4-carboxyphenyl)-1-naphthoic acid (1.3 g, 95%) as a dark yellow solid.  $^1\text{H}$  NMR (500 MHz,  $\text{DMSO-d}_6$ )  $\delta$  13.42 (s, 2H), 8.95 (d,  $J = 8.7$  Hz, 1H), 8.47 (d,  $J = 7.1$  Hz, 1H), 8.24 (d,  $J = 7.4$  Hz, 1H), 7.90 (d,  $J = 7.1$  Hz, 1H), 7.72 – 7.65 (m, 2H), 7.52 (d,  $J = 8.9$  Hz, 1H), 7.47 – 7.40 (m, 1H).

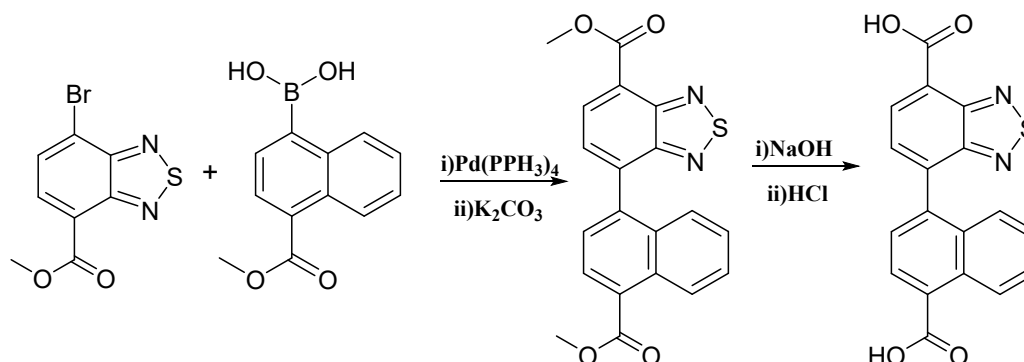

Scheme 3. The synthesis route of  $\text{H}_2\text{NB}$ .

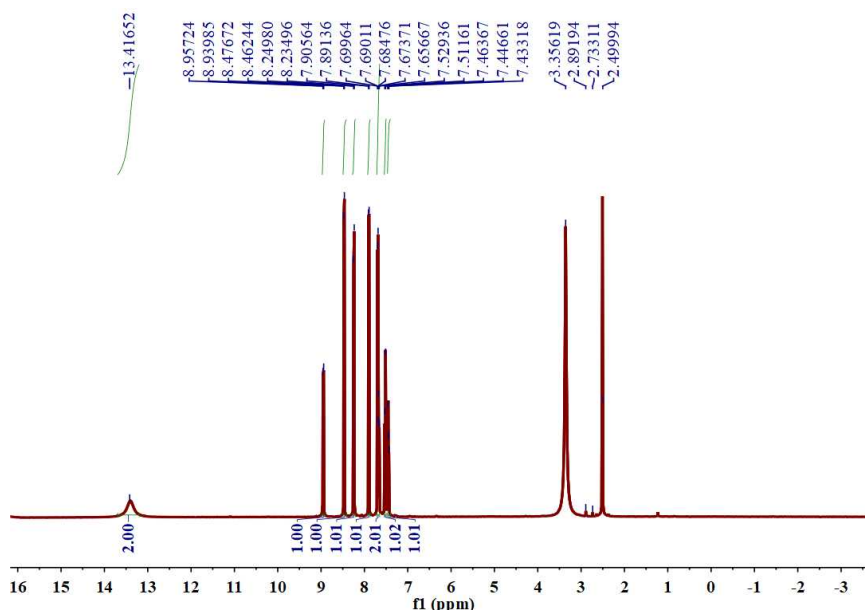

Fig. R3.  $^1\text{H}$  NMR of  $\text{H}_2\text{NB}$ .

## 1.2 Synthesis of materials

### Synthesis of UiO-67

$\text{ZrCl}_4$  (27.96 mg, 0.12 mmol),  $\text{H}_2\text{bdc}$  (16.6 mg, 0.1 mmol), DMF (5 mL) and Concentrated nitric acid (0.5 ml) were added to the reactor, sonicated for 10 min, capped and sealed, heated to 120 °C for 24 h. At the end of the reaction, the solid was collected by centrifugation, washed several times with DMF and methanol, and finally the solid was dried under vacuum at 50 °C for 4 hours.

### Synthesis of UiO-67-NA

$\text{ZrCl}_4$  (27.96 mg, 0.12 mmol),  $\text{H}_2\text{NA}$  (29.2 mg, 0.1 mmol), DMF (7.2 mL), acetic acid (1.4 ml) and triethylamine (0.1 ml) were added to the reactor, sonicated for 10 min, capped and sealed, heated to 120 °C for 24 h. At the end of the reaction, the solid was collected by centrifugation, washed several times with DMF and methanol, and finally the solid was dried under vacuum at 50 °C for 4 hours.

### Synthesis of UiO-67-BT

$\text{ZrCl}_4$  (27.96 mg, 0.12 mmol),  $\text{H}_2\text{BT}$  (30.00 mg, 0.1 mmol), DMF (7.2 mL) and acetic acid (0.4 ml) were added to the reactor, sonicated for 10 min, capped and sealed, heated to 120 °C for 24 h. At the end of the reaction, the solid was collected by centrifugation, washed several times with DMF and methanol, and finally the solid was dried under vacuum at 50 °C for 4 hours.

### Synthesis of UiO-67-NB

$\text{ZrCl}_4$  (27.96 mg, 0.12 mmol),  $\text{H}_2\text{NB}$  (35.00 mg, 0.1 mmol), DMF (7.2 mL) and acetic acid (0.4 ml) were added to the reactor, sonicated for 10 min, capped and sealed, heated to 120 °C for 24 h. At the end of the reaction, the solid was collected by centrifugation, washed several times with DMF and methanol, and finally the solid was dried under vacuum at 50 °C for 4 hours.

## 2. Characterization of catalysts

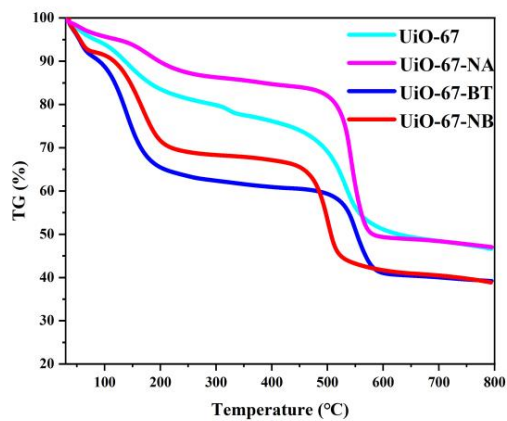

Fig. S1. TGA analyses of the four UiO-67 MOF.

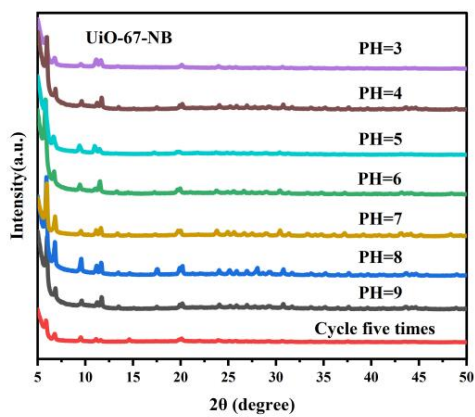

Fig. S2. PXRD analyses for UiO-67-NB MOF.

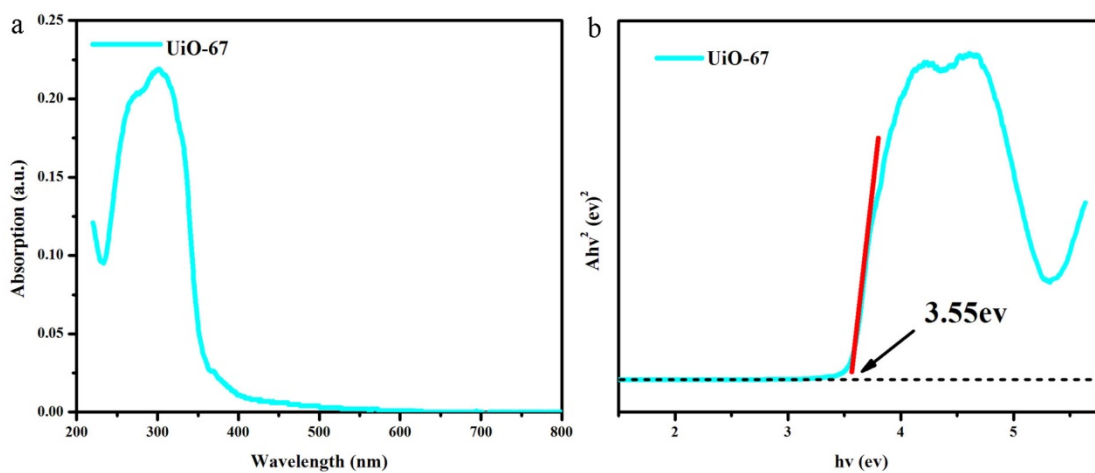

Fig. S3. Uv-vis diffuse reflectance spectra and Tauc plot for UiO-67.

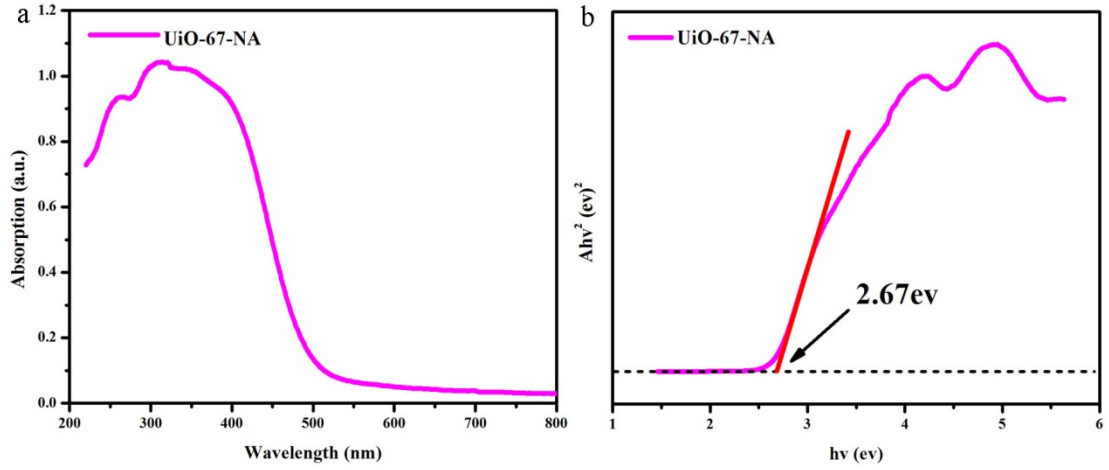

Fig. S4. Fig. S3. Uv-vis diffuse reflectance spectra and Tauc plot for UiO-67-NA.

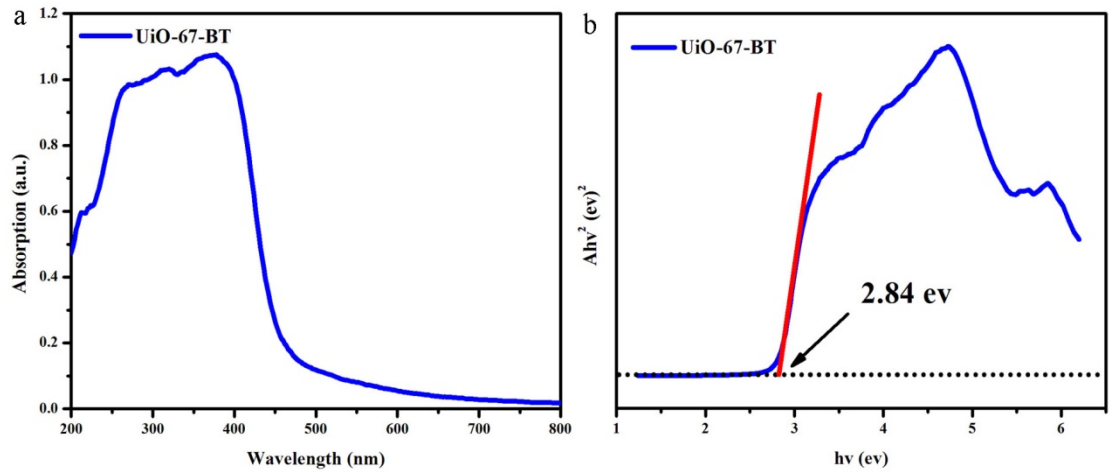

Fig. S5. Uv-vis diffuse reflectance spectra and Tauc plot for UiO-67-BT.

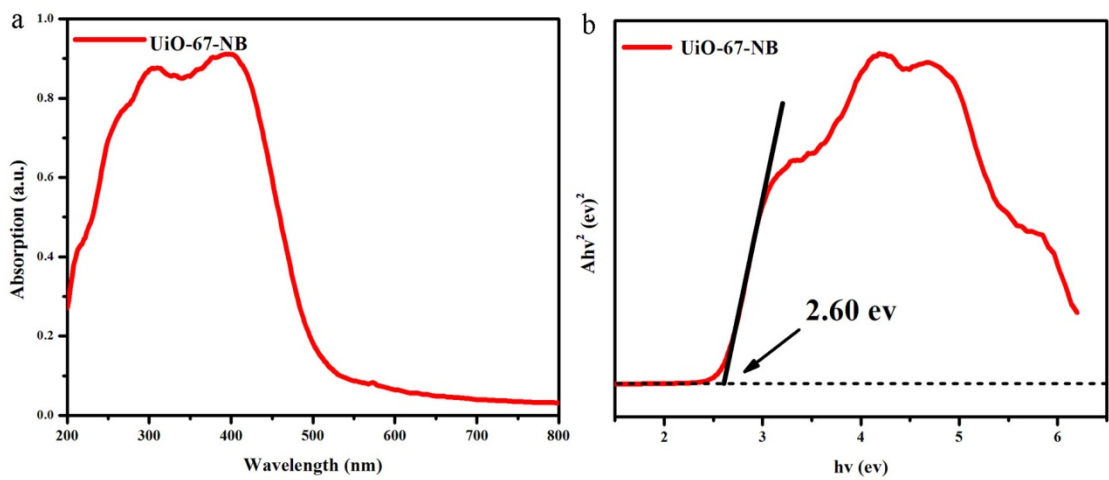

Fig. S6. Uv-vis diffuse reflectance spectra and Tauc plot for UiO-67-NB.

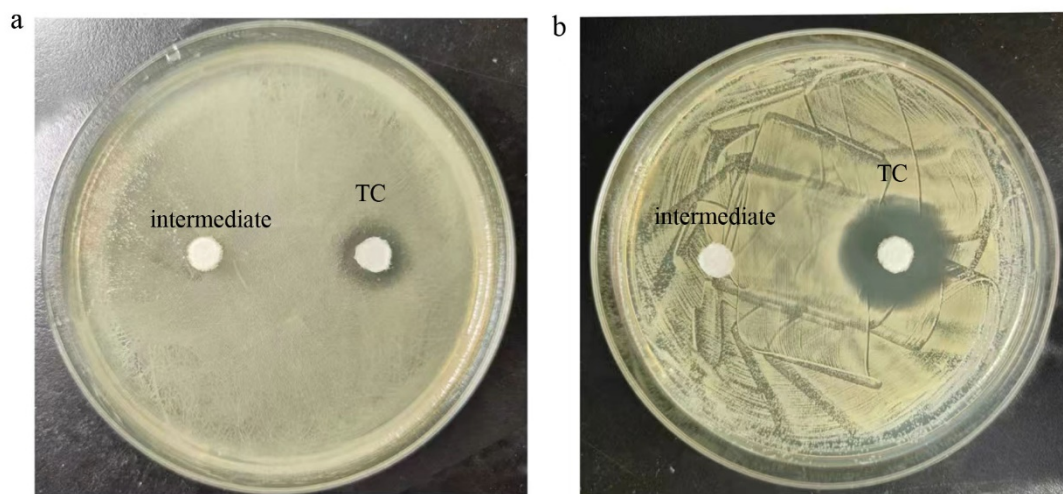

Fig. S7. The evaluation of antibacterial activities of TC and photodegradation product to *Escherichia coli* (a) and *Staphylococcus aureus* (b).

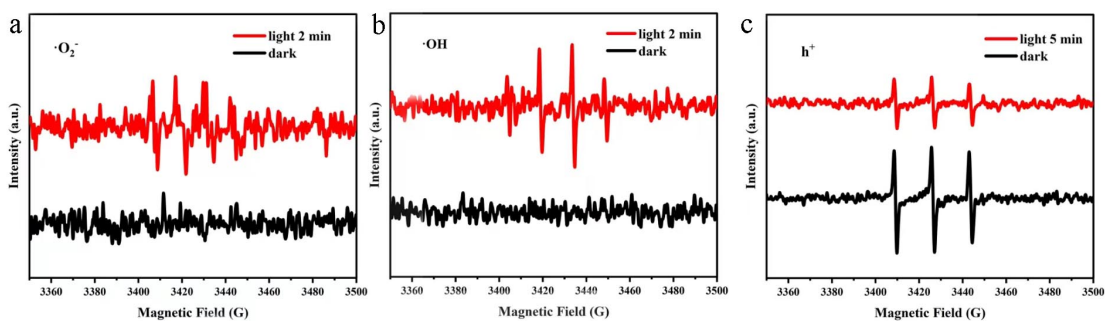

Fig. S8. ESR spectra of free radicals and holes trapped by DMPO ( $\cdot\text{O}_2^-$  and  $\cdot\text{OH}$ ) and TEMPO ( $h^+$ ) in UiO-67-NA dispersion.

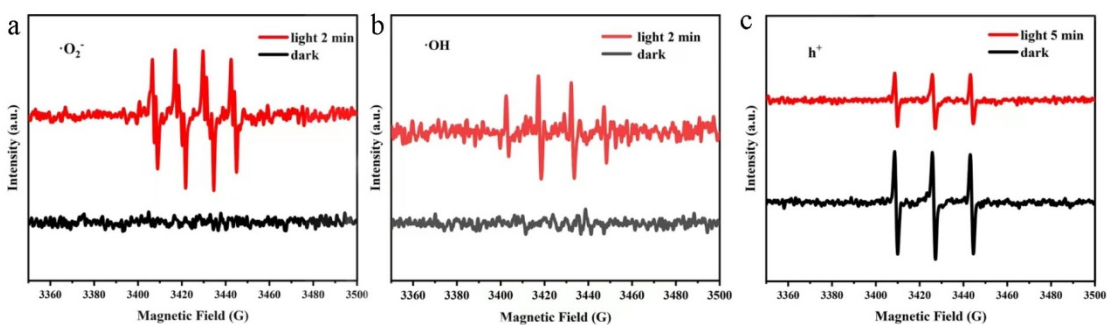

Fig. S9. ESR spectra of free radicals and holes trapped by DMPO ( $\cdot\text{O}_2^-$  and  $\cdot\text{OH}$ ) and TEMPO ( $h^+$ ) in UiO-67-BT dispersion.

Table S1. Photocatalytic Activity of MOF-based materials for the reduction of TC.

| Catalysts | $k$ ( $\text{min}^{-1}$ ) | Ref.      |
|-----------|---------------------------|-----------|
| UiO-67-NB | 0.0530                    | This work |



|                                         |               |                  |
|-----------------------------------------|---------------|------------------|
| Ag/AgCl/BiOCl-0.5                       | 0.0498        | 1                |
| AgI/UiO-66(NH <sub>2</sub> )            | 0.0360        | 2                |
| Bi <sub>2</sub> S <sub>3</sub> /MOF-808 | 0.0290        | 3                |
| CO/MOF                                  | 0.0283        | 4                |
| DUT-5/BMO                               | 0.0262        | 5                |
| Fe-MIL-101                              | 0.0163        | 6                |
| 100NU                                   | 0.0137        | 7                |
| <b>UiO-67-BT</b>                        | <b>0.0088</b> | <b>This work</b> |
| <b>UiO-67-NA</b>                        | <b>0.0083</b> | <b>This work</b> |
| Fe-MIL-53                               | 0.0023        | 6                |

---

### 3. References

1. J. Wu, X. Fang, H. Dong, L. Lian, N. Ma and W. Dai, Bimetallic silver/bismuth-MOFs derived strategy for Ag/AgCl/BiOCl composite with extraordinary visible light-driven photocatalytic activity towards tetracycline, *J. Alloys Compd.*, 2021, **877**, 160262.
2. Y. Pan, X. Yuan, L. Jiang, H. Wang, H. Yu and J. Zhang, Stable self-assembly AgI/UiO-66 (NH<sub>2</sub>) heterojunction as efficient visible-light responsive photocatalyst for tetracycline degradation and mechanism insight, *J. Chem. Eng.*, 2020, **384**, 123310.
3. F. Wang, R. Xue, Y. Ma, Y. Ge, Z. Wang, X. Qiao and P. Zhou, Study on the performance of a MOF-808-based photocatalyst prepared by a microwave-assisted method for the degradation of antibiotics, *Rsc. Adv.*, 2021, **11**, 32955-32964.
4. C. Hou, X. Yuan, M. Niu, Y. Li, L. Wang and M. Zhang, In situ composite of Co-MOF on a Ti-based material for visible light multiphase catalysis: Synthesis and the photocatalytic degradation mechanism, *New J. Chem.*, 2022, **46**, 11341-11349.
5. Y. Zhou, T. Yao, Y. Tan, Y. Chen, Z. Chen and J. Zhang, Preparation of a novel composite material aluminum-based MOF (DUT-5)/Bi<sub>2</sub>MoO<sub>6</sub> for degradation of tetracycline, *Catal. Lett.*, 2023, **153**, 1743-1755.
6. D. Wang, F. Jia, H. Wang, F. Chen, Y. Fang, W. Dong, G. Zeng, X. Li, Q. Yang and X. Yuan, Simultaneously efficient adsorption and photocatalytic degradation of tetracycline by Fe-based MOFs, *J. Colloid Interf. Sci.*, 2018, **519**, 273-284.

7. S. Liu, Z. Ren, H. Xu, Y. Xing, X. Jin, G. Ni and Z. Wang, Visible-light-responsive NaBiO<sub>3</sub>/UiO-67 heterojunction with enhanced photocatalytic performance, *Mat. Sci. Semicon Proc.*, 2022, **147**, 106708.
